# Supplementary material for: Rapid whole‐blood assay to detect SARS‐CoV‐2‐specific memory T‐cell immunity following a single dose of AstraZeneca ChAdOx1‐S COVID‐19 vaccine
Source: PubMed Central journal article supplement — Clin Transl Immunology. 2021 Aug 12;10(8):e1326. doi: 10.1002/cti2.1326 (PMC8360255; doi:10.1002/cti2.1326), 2021-08-12
Supplement: CTI2-10-e1326-s001.pdf [file CTI2-10-e1326-s001.pdf]

## Supplementary Table 1

| Cohort                  | Median Age | Sex Distribution | Days Post Vaccination |
|-------------------------|------------|------------------|-----------------------|
| Pre Vaccination (n=26)  | 39         | 13 F / 13 M      | n/a                   |
| Post Vaccination (n=58) | 40         | 39 F / 19 M      | 12-23 days            |

**Supplementary Table 1:** Demographics for PreVax and PostVax cohorts.

## Supplementary Table 2

| Cytokine      | Spike 1 (<1 pg mL <sup>-1</sup> ) |                         | Spike 2 (<1 pg mL <sup>-1</sup> ) |                         |
|---------------|-----------------------------------|-------------------------|-----------------------------------|-------------------------|
|               | Pre vaccination (n=26)            | Post vaccination (n=58) | Pre vaccination (n=26)            | Post vaccination (n=58) |
| IFN- $\gamma$ | 20                                | 17                      | 15                                | 26                      |
| IL-2          | 16                                | 10                      | 18                                | 19                      |
| IL-4          | 17                                | 32                      | 20                                | 37                      |
| IL-5          | 25                                | 34                      | 25                                | 39                      |
| IL-10         | 21                                | 34                      | 21                                | 34                      |
| IL-13         | 16                                | 44                      | 19                                | 23                      |
| IL-17A        | 20                                | 42                      | 22                                | 32                      |
| TNF           | 21                                | 31                      | 19                                | 35                      |

**Supplementary Table 2:** Frequency of non-responders in PreVax (n=26) and PostVax (n=58) whole blood assays. Table displays the proportion of each cohort that showed a cytokine response measuring below 1 pg mL<sup>-1</sup> following stimulation with either spike pool 1 or spike pool 2.

## Supplementary Figure 1

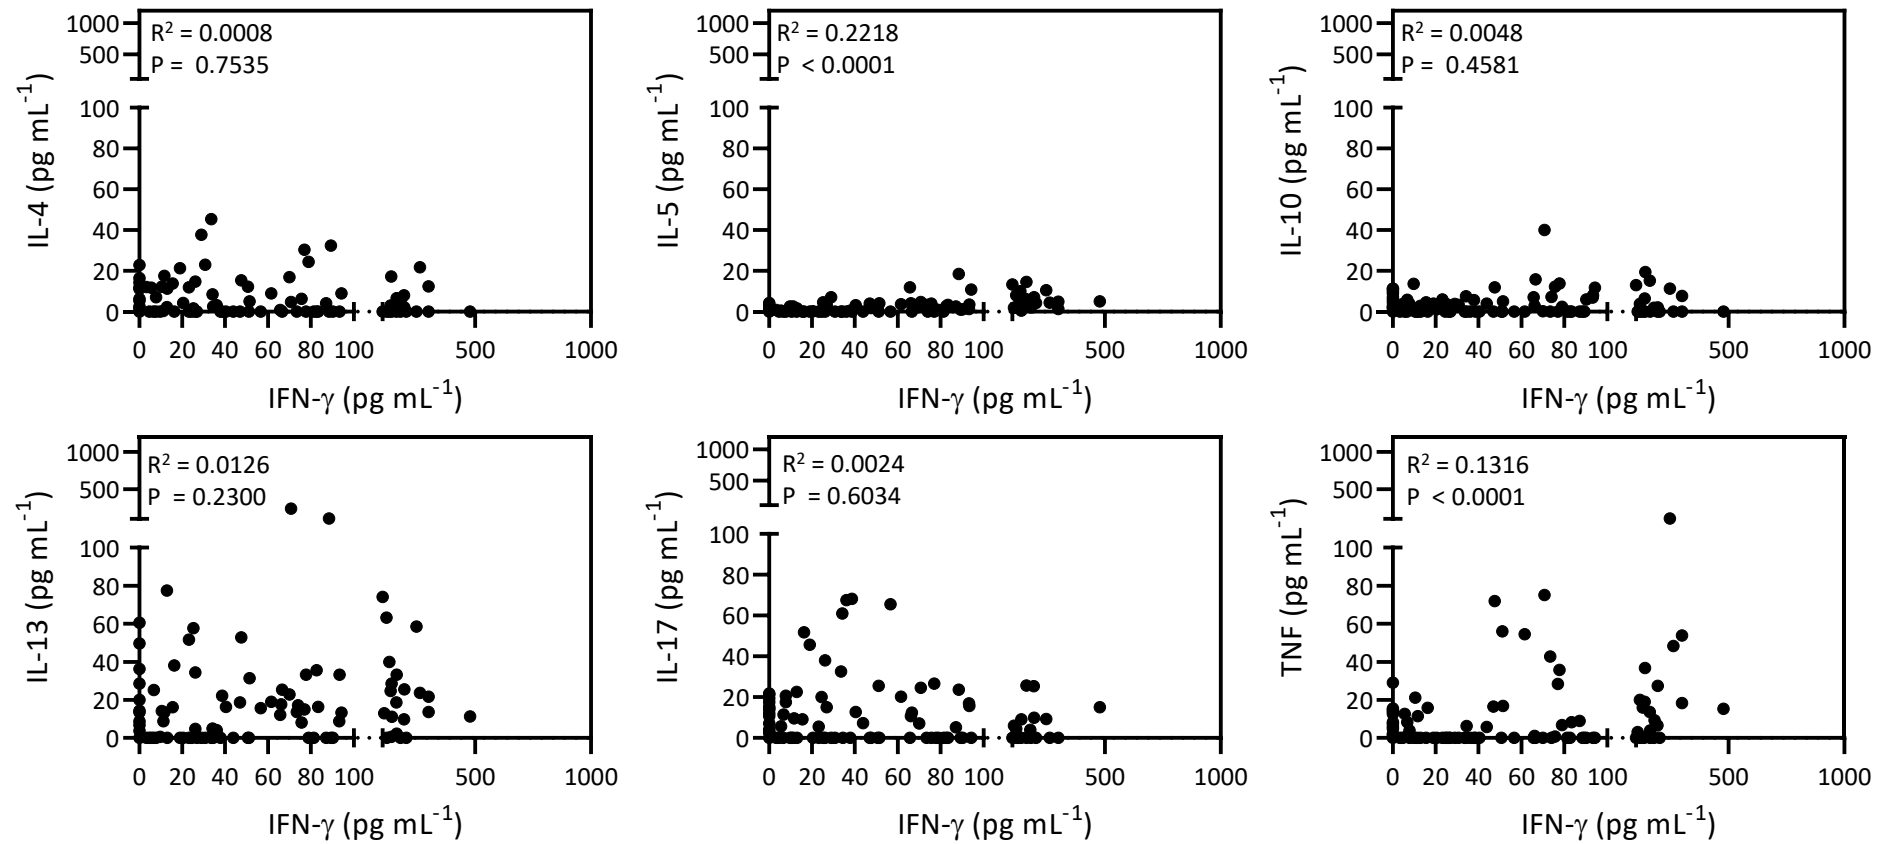

**Supplementary Figure 1:** Correlation of IFN- $\gamma$  production following vaccination with other cytokine responses. Data represents the concentration of PostVax samples stimulated with either spike pool 1 or spike pool 2.
